# Supplementary material for: Time-resolved detection of SDS-induced conformational changes in α-synuclein by a micro-stopped-flow system
Source: Royal Society of Chemistry journal article supplement (doi:10.1039/d0ra09614h), 2021-01-01
Supplement: d0ra09614h1.pdf [file d0ra09614h1.pdf]

## Supporting Information

### Time-resolved detection of SDS-induced conformational changes in $\alpha$ -synuclein by a micro-stopped-flow system

Shunki Takaramoto<sup>1</sup>, Yusuke Nakasone<sup>1</sup>, Kei Sadakane<sup>2</sup>, Shinsaku Maruta<sup>2</sup>, Masahide Terazima<sup>1</sup>

1) Department of Chemistry, Graduate School of Science, Kyoto University, Kyoto 606-8502, Japan.

2) Department of Bioinformatics, Graduate School of Engineering, Soka University, Hachioji, Tokyo 192-8577, Japan

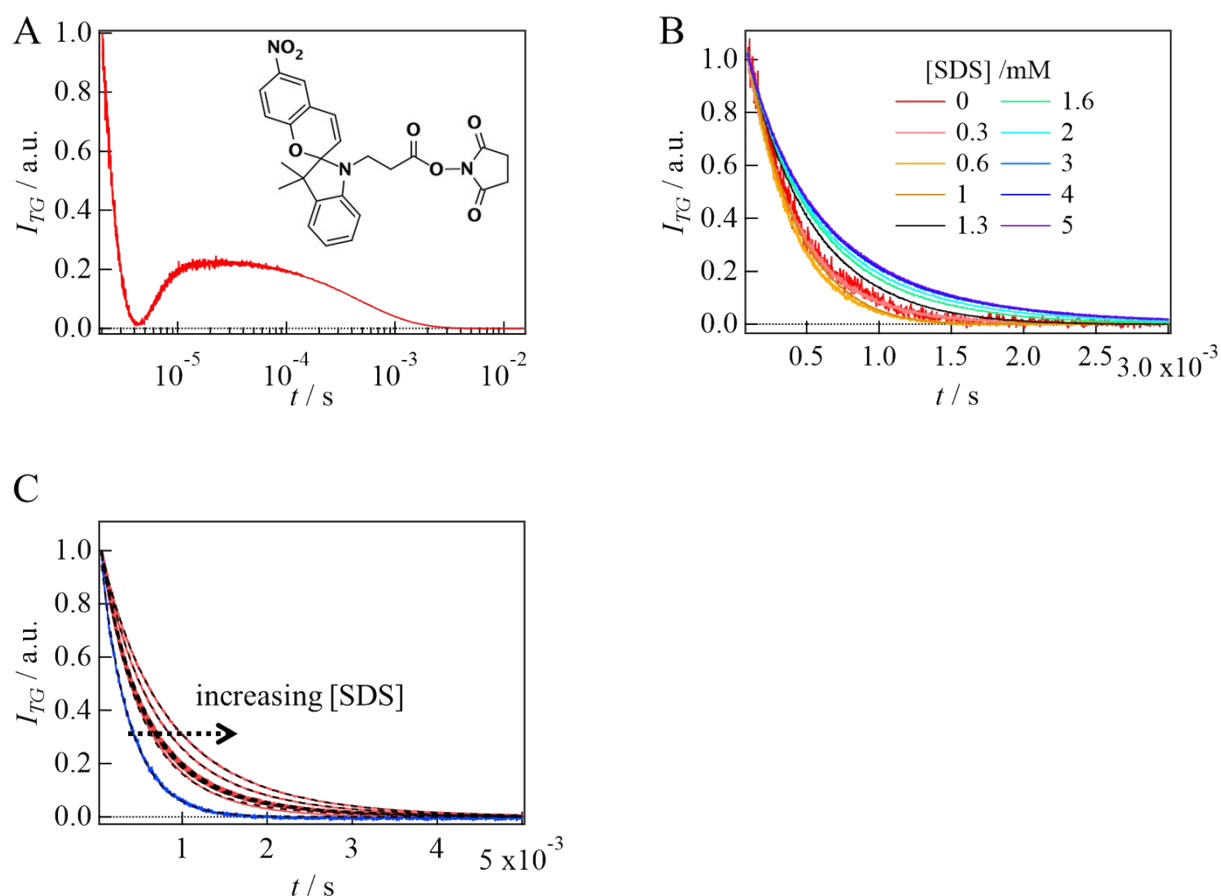

Figure SI-1. (A) Typical TG signal of NSP at 3 mM SDS ( $q^2 = 3.6 \times 10^{12} \text{ m}^{-2}$ ). Inset: molecular structure of NSP. (B) Dependence of the TG signal on lower [SDS] condition at  $q^2 = 3.6 \times 10^{12} \text{ m}^{-2}$ . (C) The TG signals of NSP at 0 mM (blue), and 2, 3, 4, 5, 6, 7, 8, 9, 10, 25, 50 mM SDS used for calculation of  $D$  of the SDS micelle (red) at  $q^2 = 3.9 \times 10^{12} \text{ m}^{-2}$ . The broken lines show fitting curves based on Eq. (2).

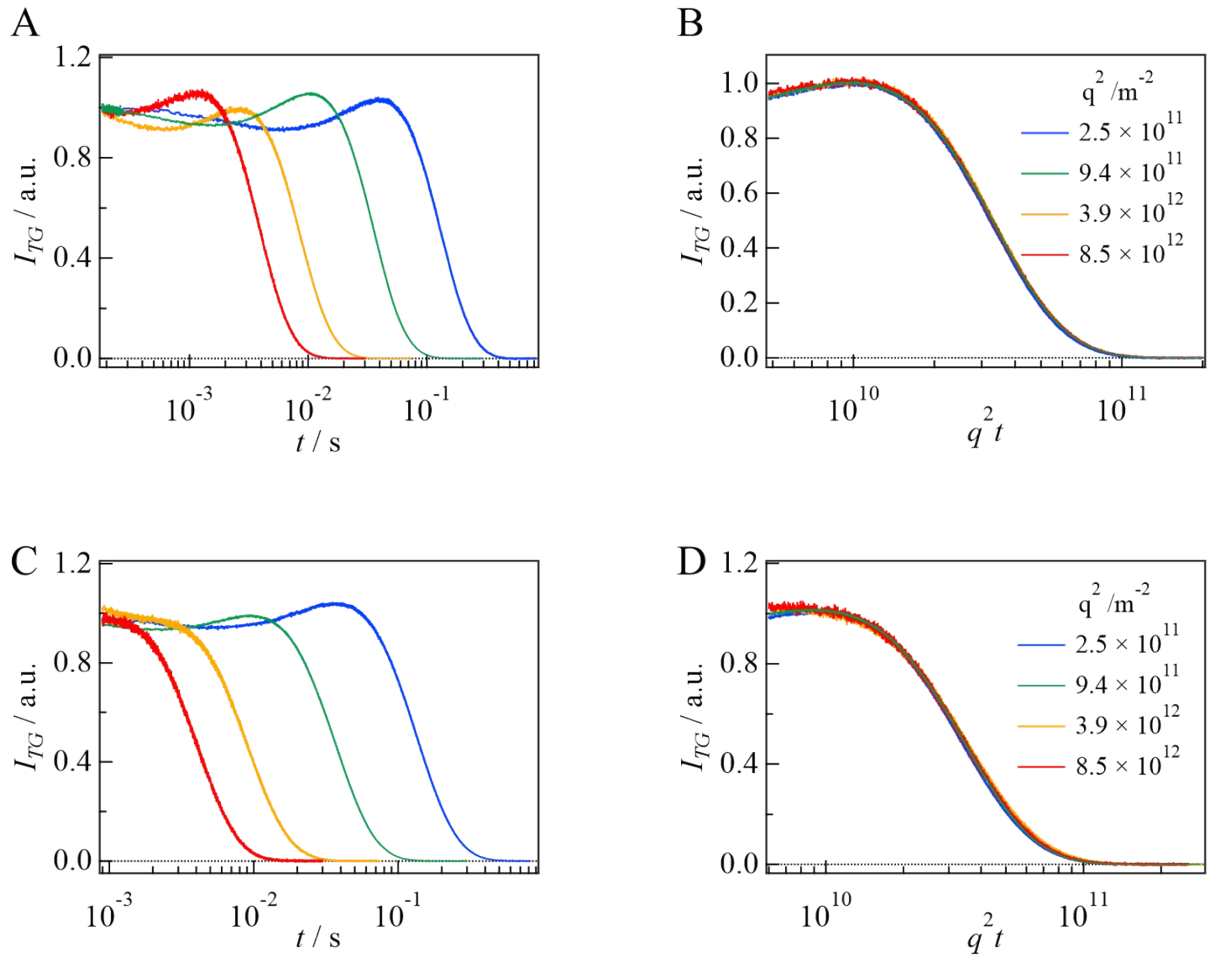

Figure SI-2.  $q^2$  dependence of the TG signal of  $\alpha$ Syn in the presence of 2 mM SDS (A). The  $q^2$  values are  $8.5 \times 10^{12} \text{ m}^{-2}$ ,  $3.9 \times 10^{12} \text{ m}^{-2}$ ,  $9.4 \times 10^{11} \text{ m}^{-2}$ , and  $2.5 \times 10^{11} \text{ m}^{-2}$ , from left to right. (B)  $q^2 t$  plot of the rise-decay profiles at 2 mM SDS. (C) The  $q^2$  dependence at 1 mM SDS. The  $q^2$  values are the same as that of (A). (D) The  $q^2 t$  plot of the rise-decay profiles at 1 mM SDS.

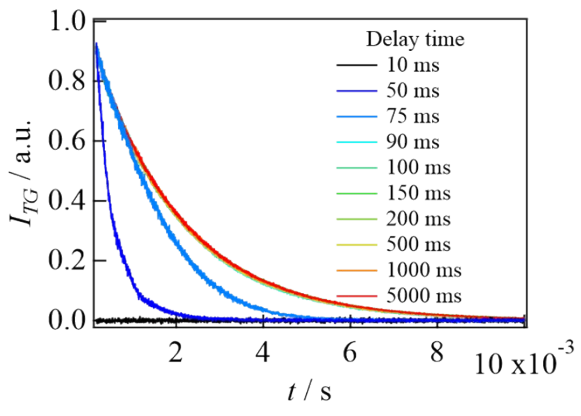

Figure SI-3. Diffusion signals of Bovine Serum Albumin labeled with NSP at several delay times after mixing two identical solutions containing 20  $\mu\text{M}$  protein in PBS buffer ( $q^2 = 3.8 \times 10^{12} \text{ m}^{-2}$ ).
